# Supplementary material for: The prognostic value of p62 in solid tumor patients: a meta-analysis
Source: PubMed Central journal article supplement (PMC5790537; doi:10.18632/oncotarget.23101), 2017-12-07
Supplement: oncotarget-09-4258-s001.pdf [file oncotarget-09-4258-s001.pdf]

# The prognostic value of p62 in solid tumor patients: a meta-analysis

## SUPPLEMENTARY MATERIALS

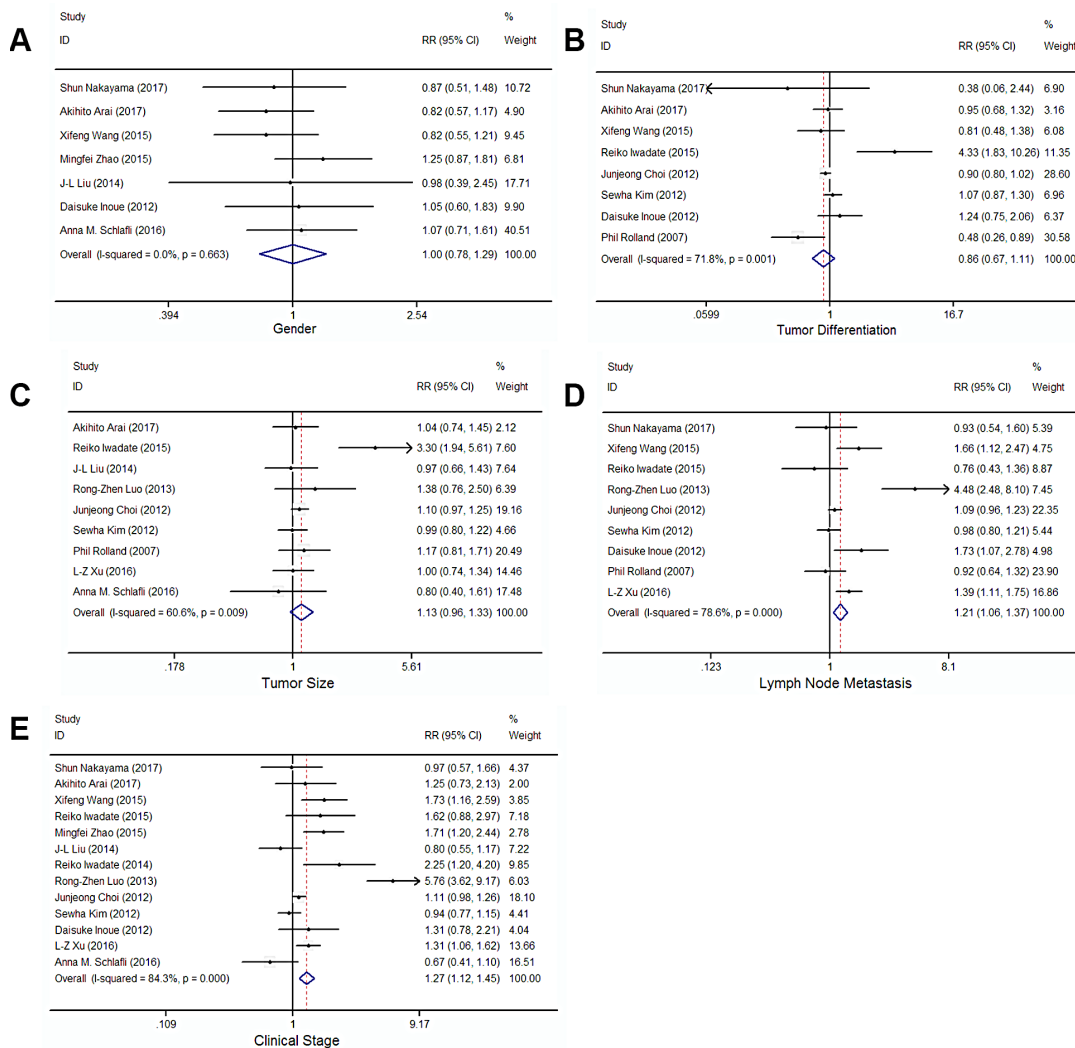

**Supplementary Figure 1:** Forest plot describing the association between over-expressed p62 and clinicopathological parameters, including Gender (A), Tumor Differentiation (B), Tumor Size (C), Lymph Node Metastasis (D), and Clinical Stages (E).

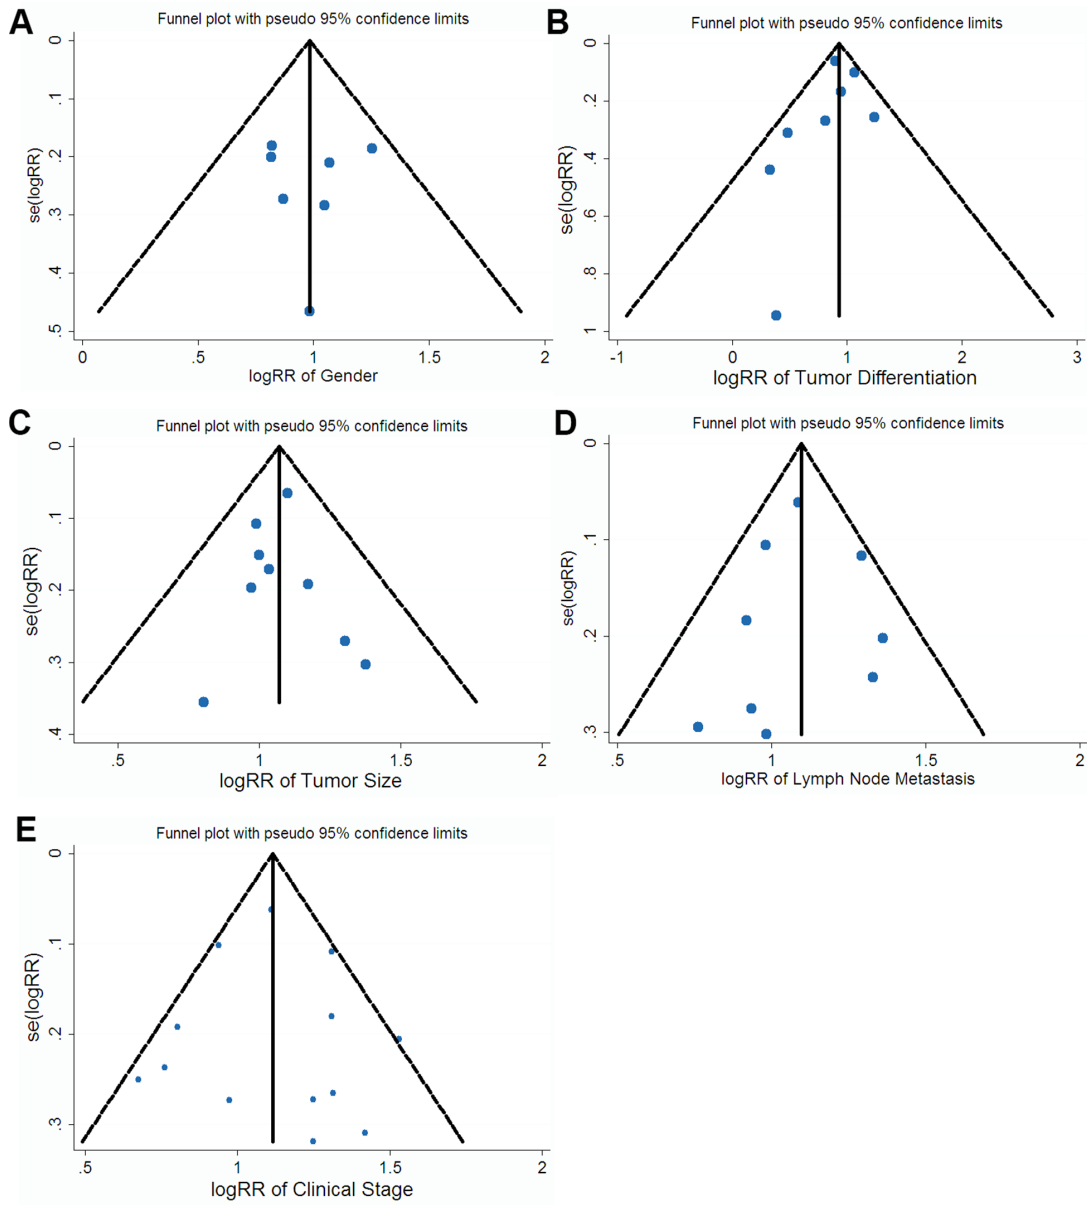

**Supplementary Figure 2: Funnel plot for the assessment of potential publication bias regarding clinicopathological parameters in the meta-analysis.** Clinicopathological parameters including Gender (A), Tumor Differentiation (B), Tumor Size (C), Lymph Node Metastasis (D), and Clinical Stages (E).
